# Supplementary material
Source: PubMed Central journal article supplement (PMC2597787)
Supplement: NIHMS61255-supplement-si20060321_073.pdf [file NIHMS61255-supplement-si20060321_073.pdf]

## Supporting Info to:

### Phosphonic Acid Monolayers for Binding of Bioactive Molecules to Titanium Surfaces

Nina Adden, Lara J. Gamble, David G. Castner, Andrea Hoffmann, Gerhard Gross,  
Henning Menzel

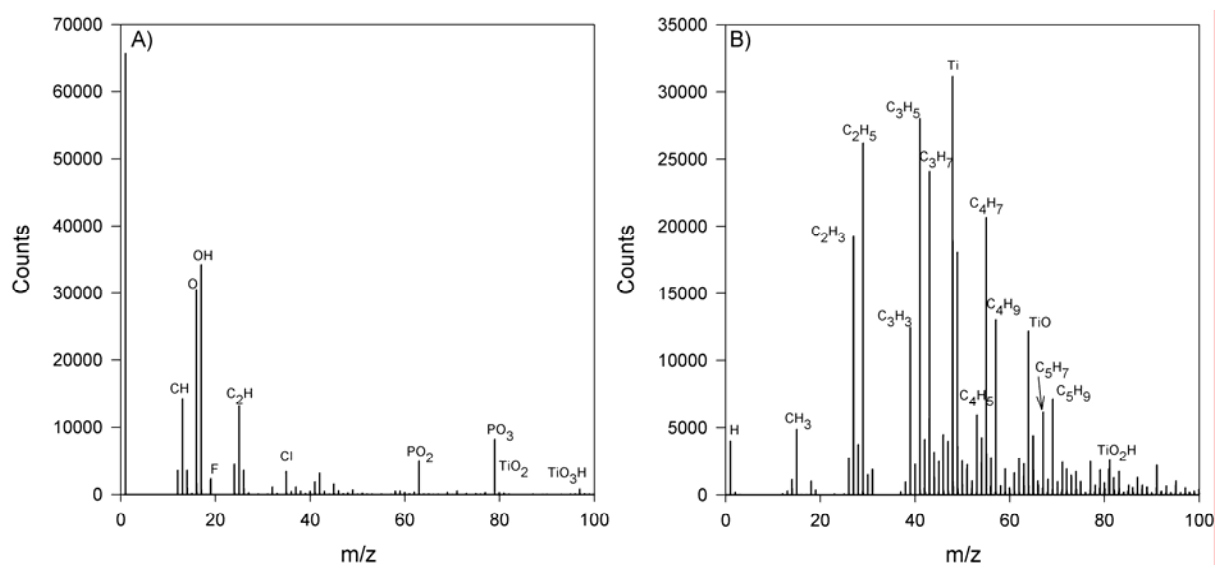

Figure S1. A) negative and B) positive secondary ion spectra of the Ti90/Al6/V4 substrate.

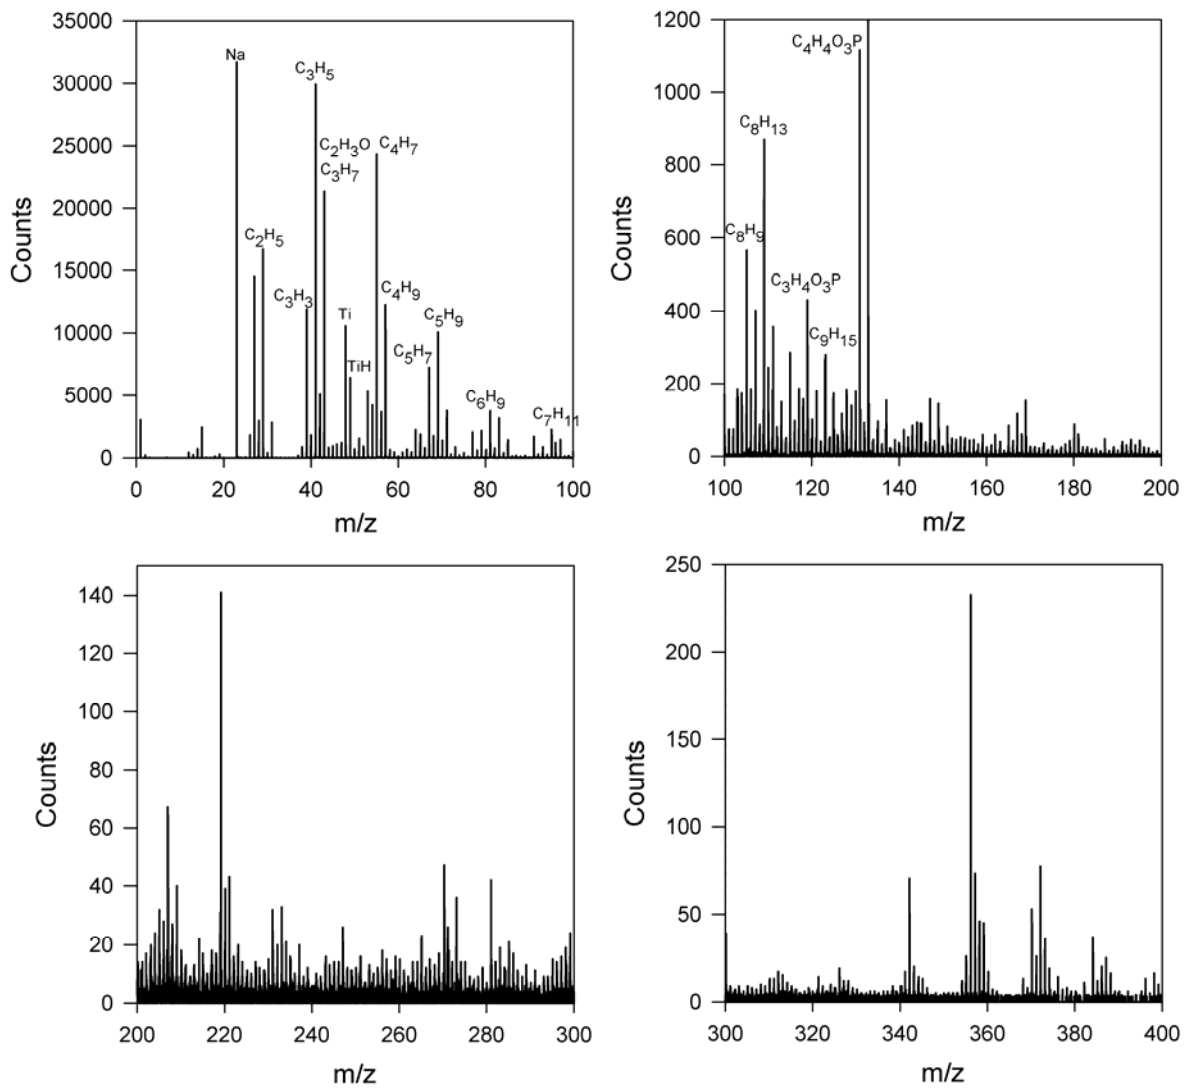

**Figure S2. Positive secondary ion spectra the of (11-hydroxyundecyl)phosphonic acid monolayer on Ti90/Al6/V4.**

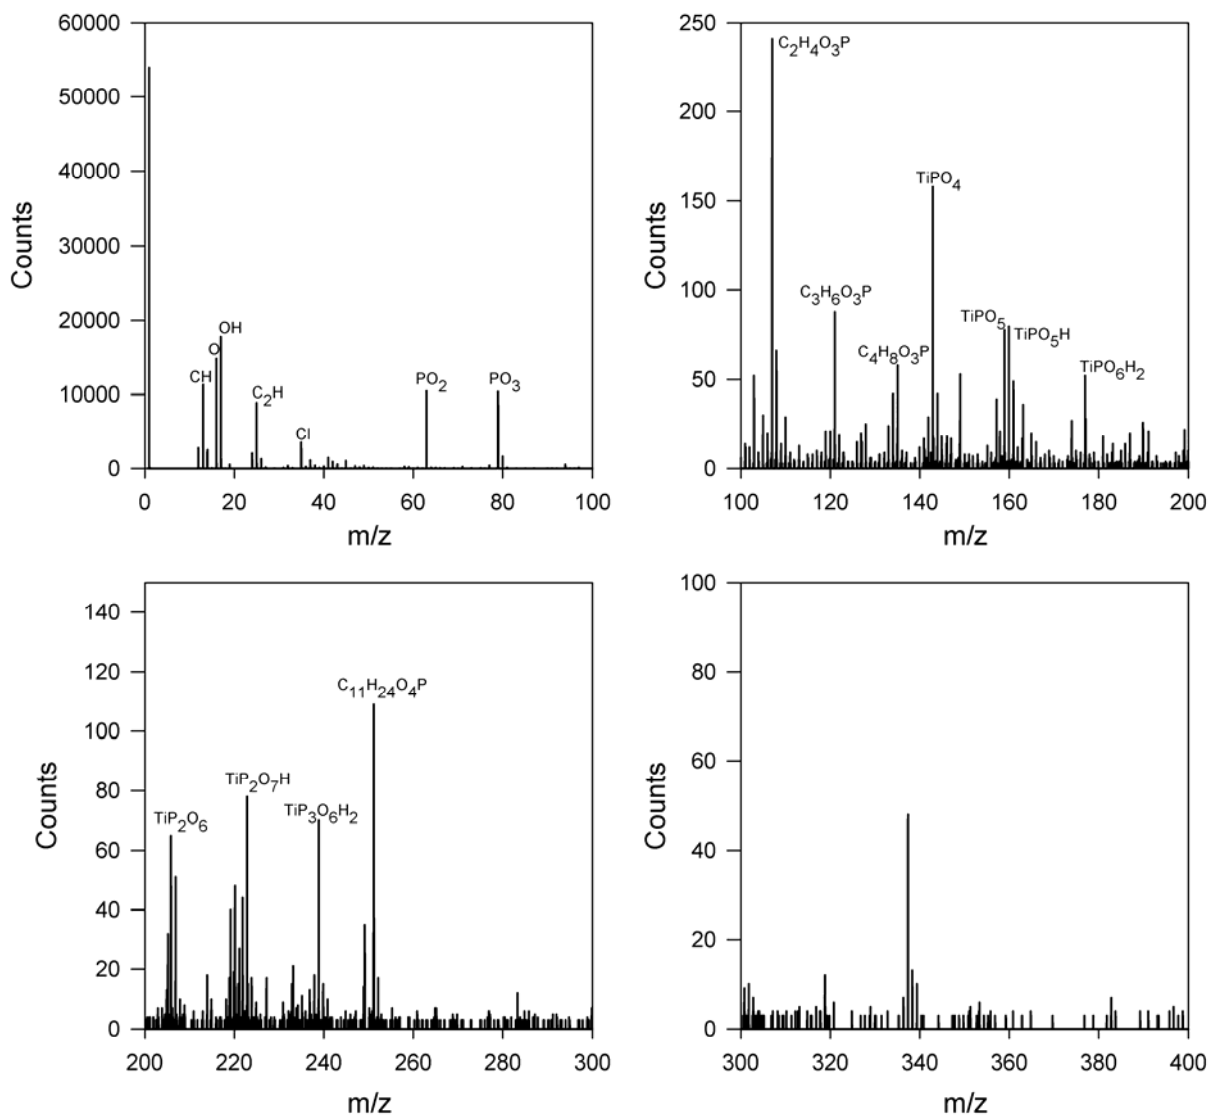

**Figure S3. Negative secondary ion spectra of the (11-hydroxyundecyl)phosphonic acid monolayer on Ti90/Al6/V4.**

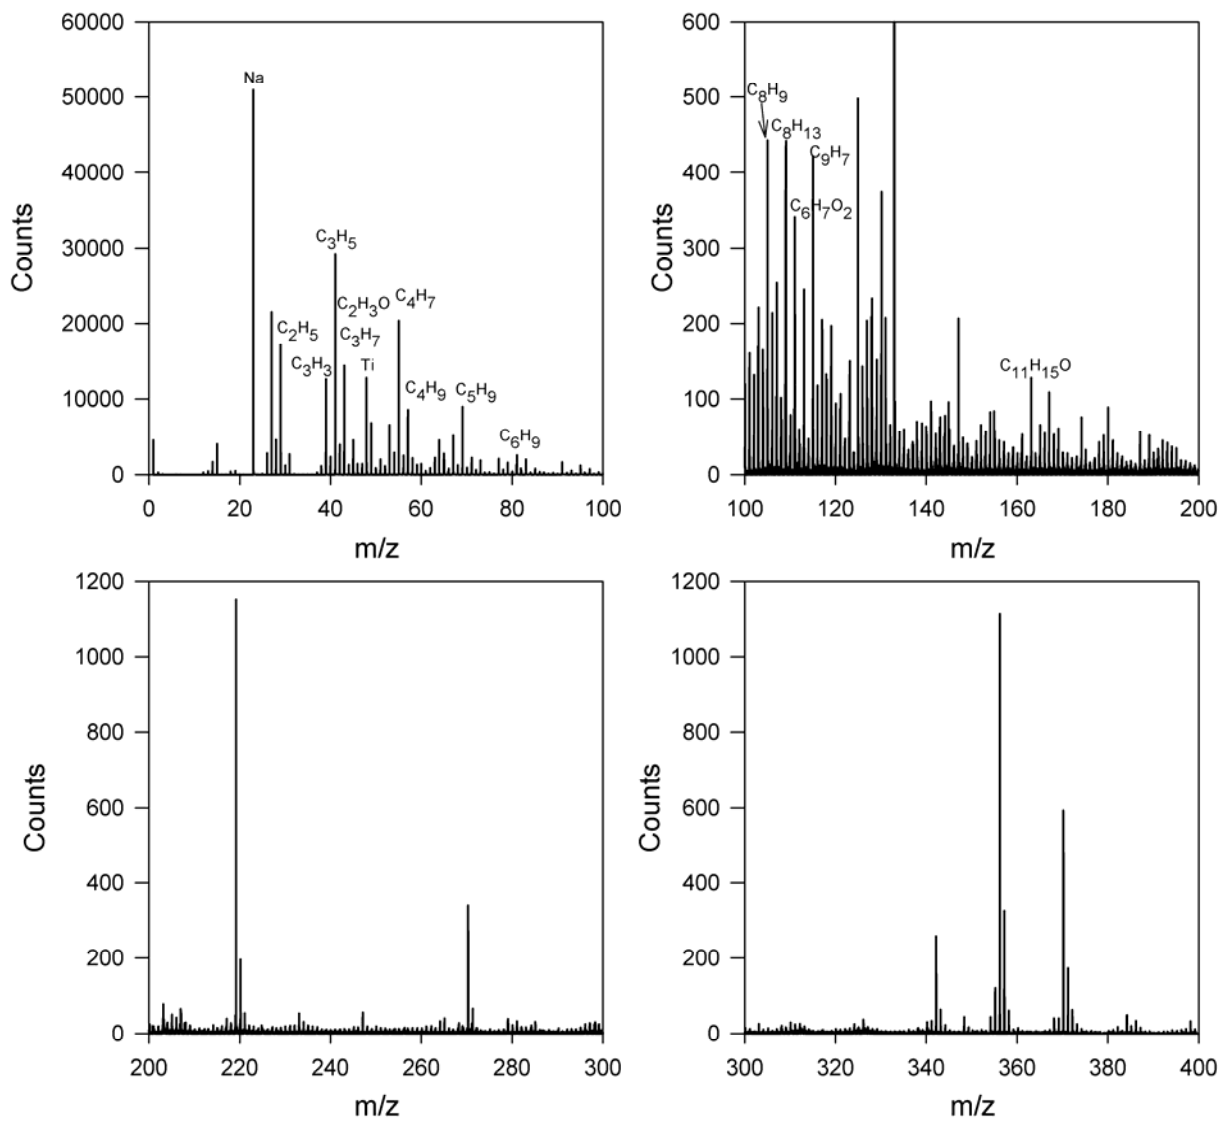

**Figure S4. Positive secondary ion spectra of the (12-carboxydodecyl)phosphonic acid monolayer on Ti90/Al6/V4.**

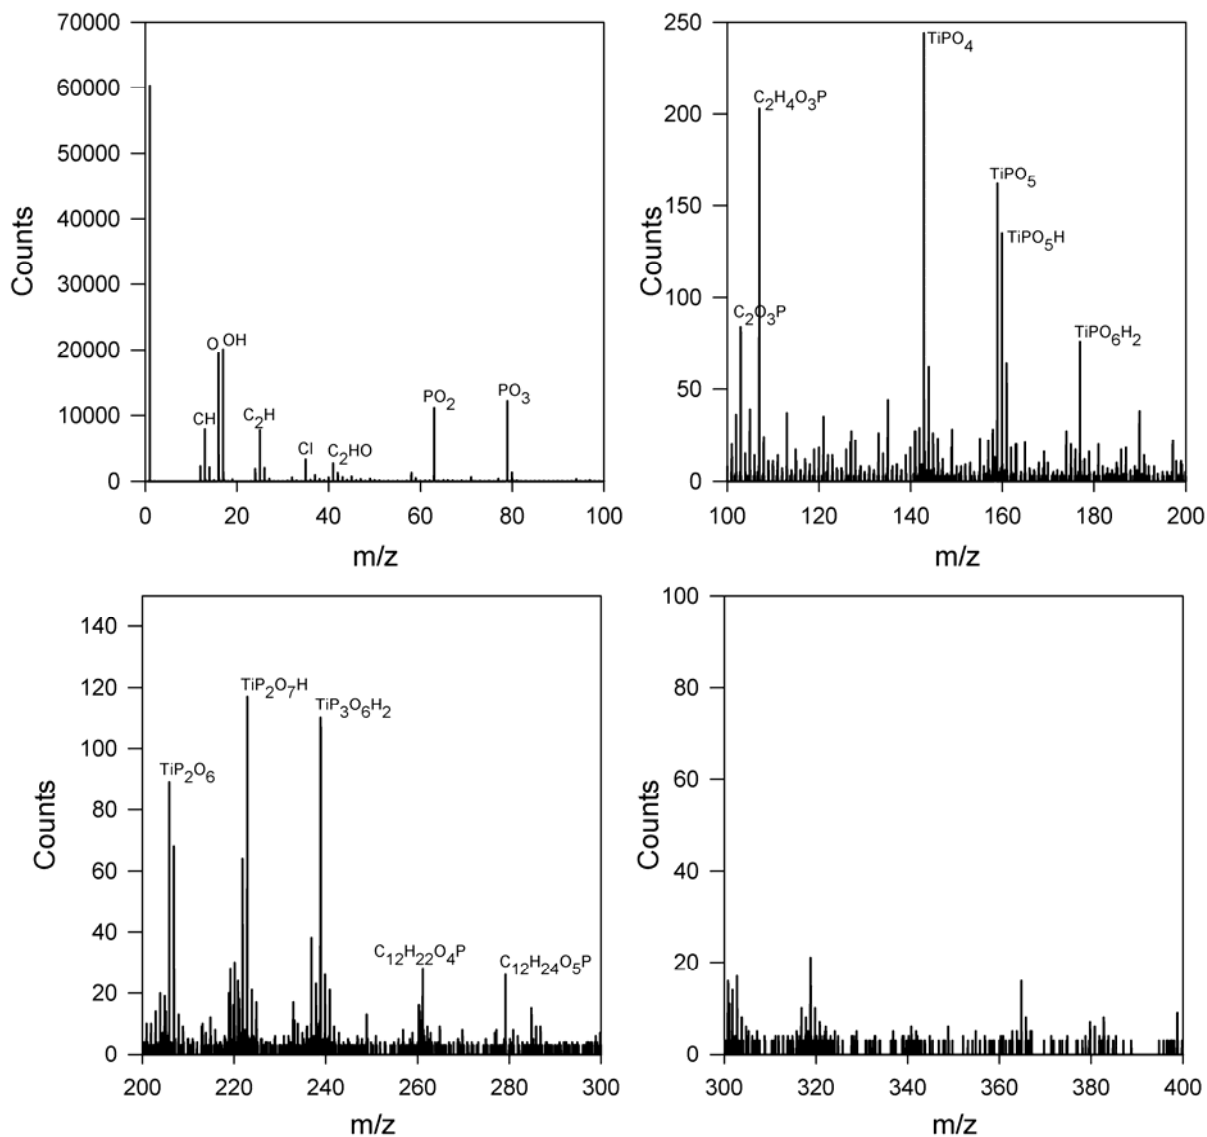

**Figure S5. Negative secondary ion spectra of the (12-carboxydodecyl)phosphonic acid monolayer on Ti90/Al6/V4.**
